# Supplementary material
Source: PubMed Central journal article supplement (PMC5886060)
Supplement: ddx382_mescietal_supplementaryfile.pdf [file ddx382_mescietal_supplementaryfile.pdf]

**Figure S1**

**A**

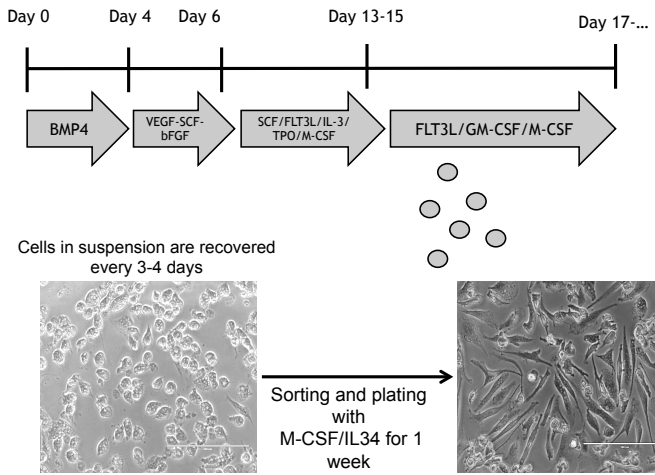

**B**

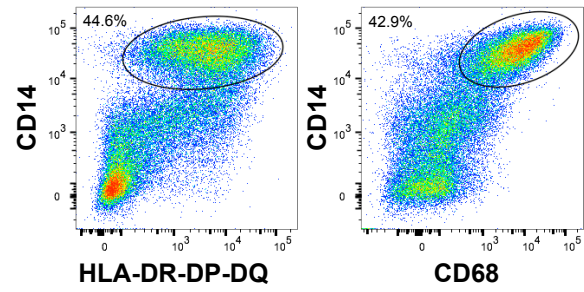

**C**

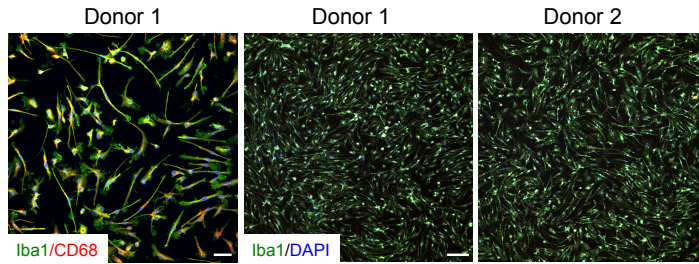

**D**

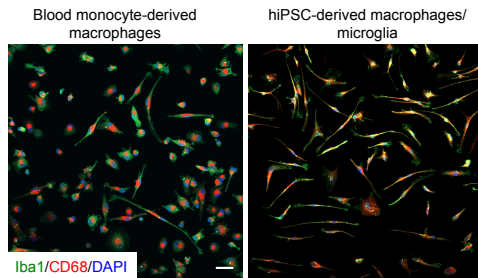

**E**

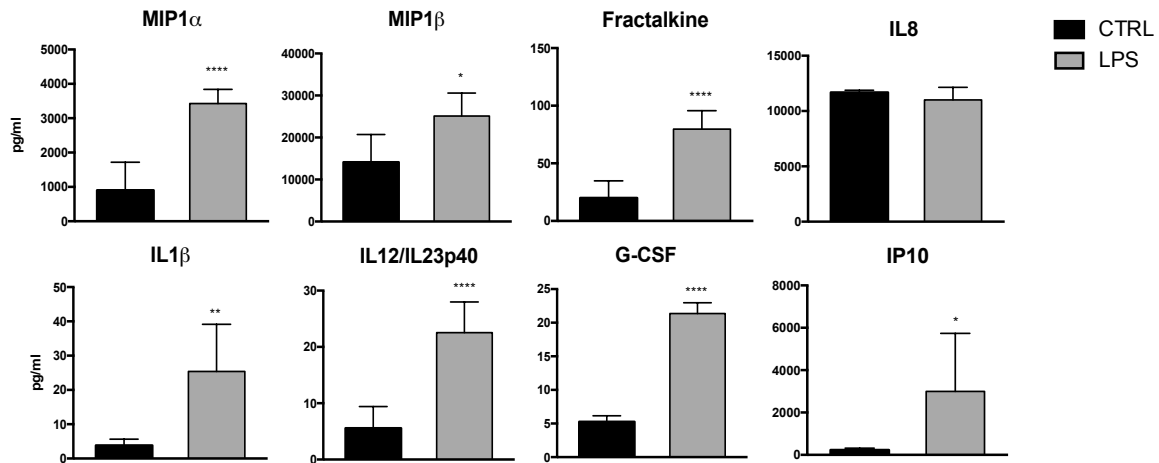

**Figure S2**

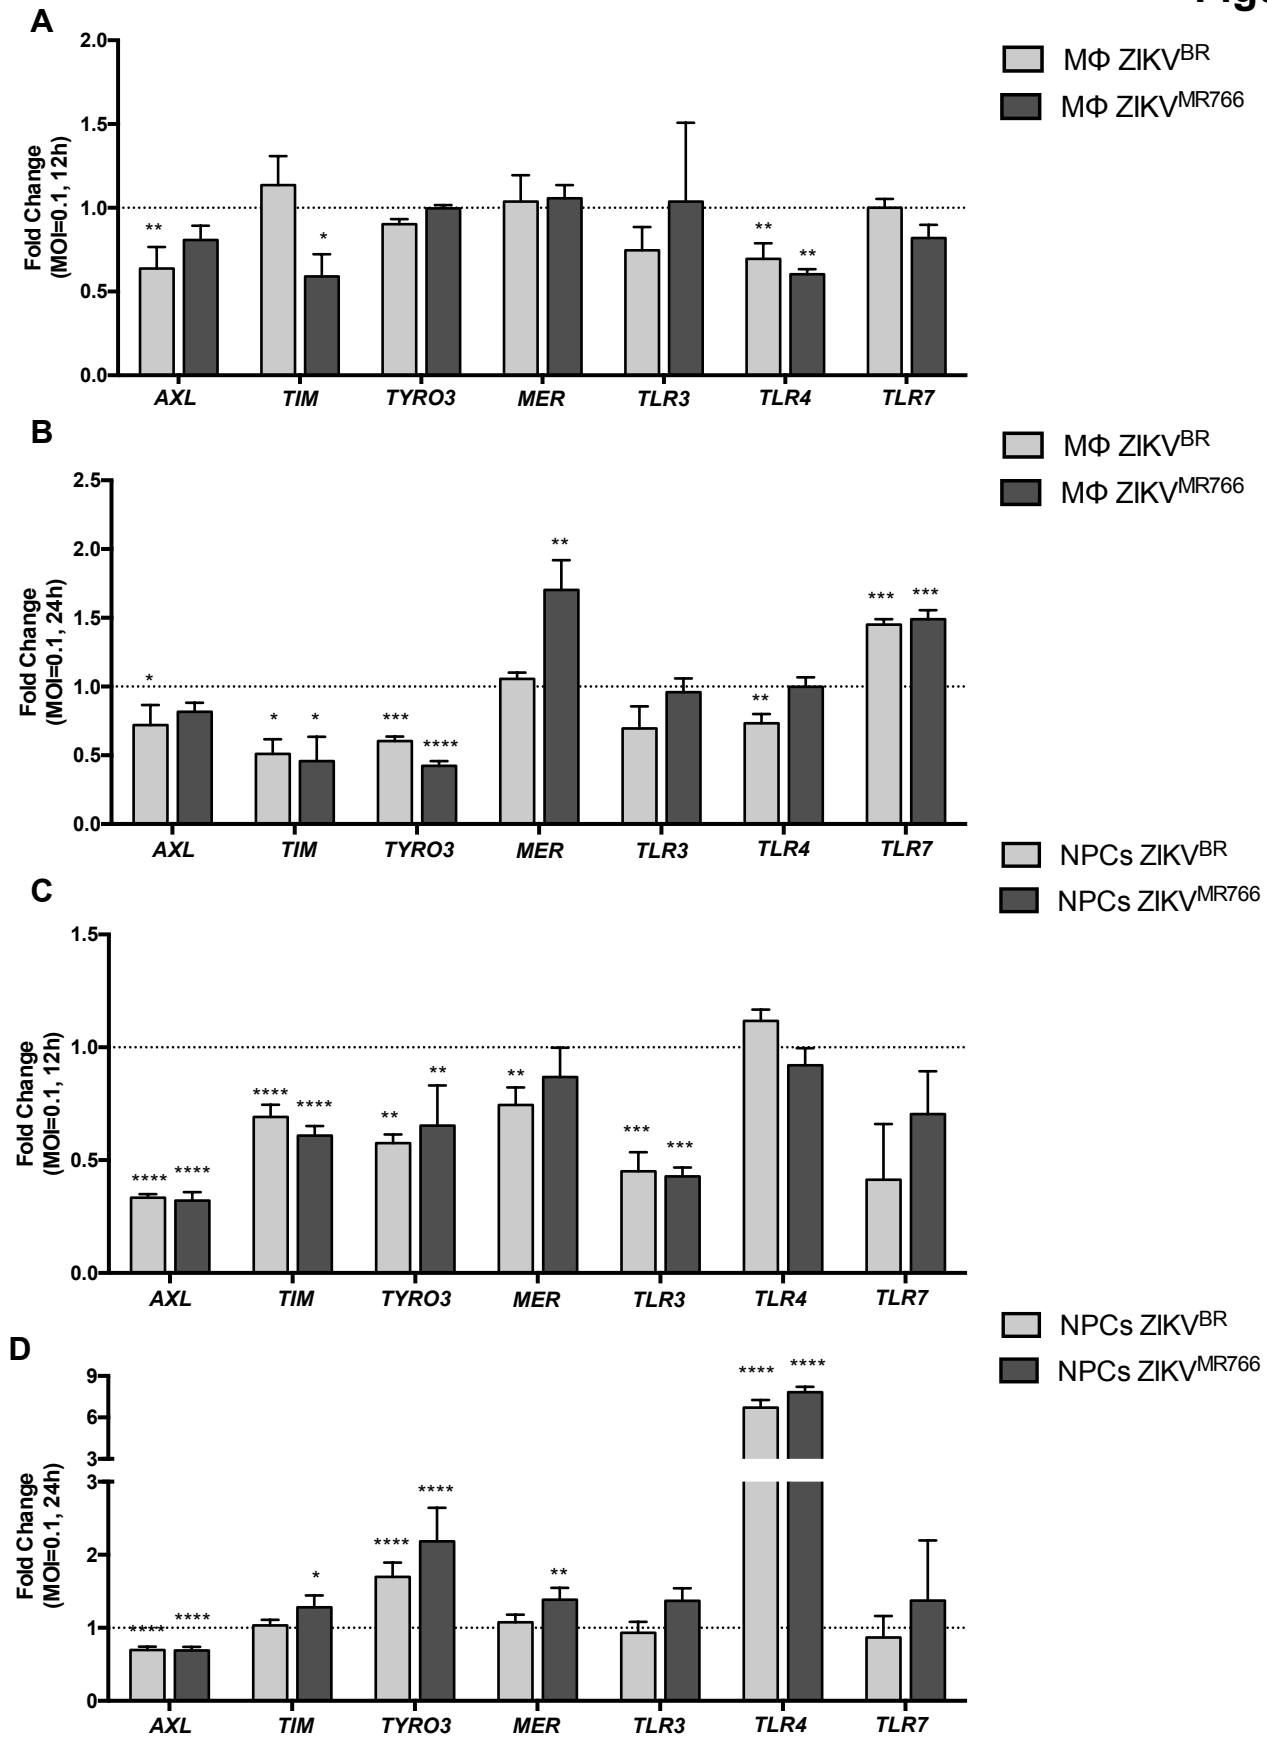



Figure S3

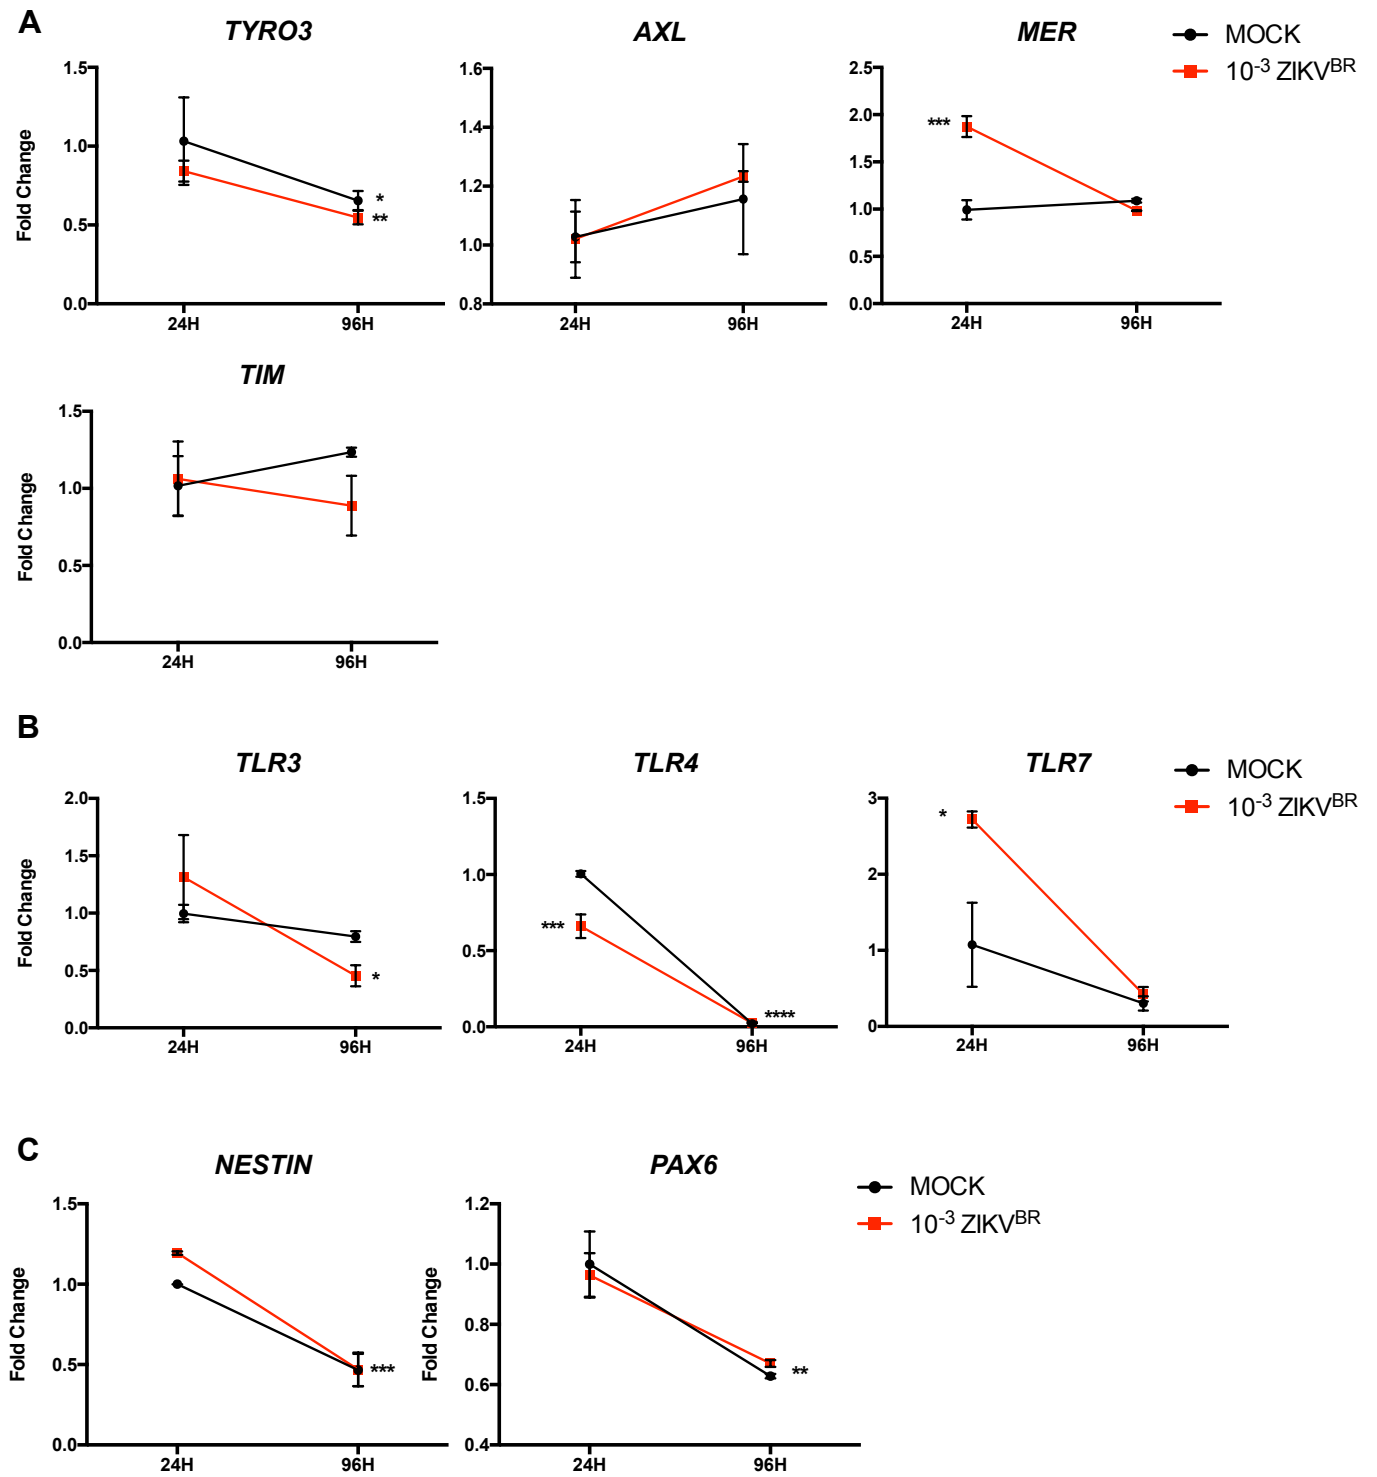

Figure S4

A

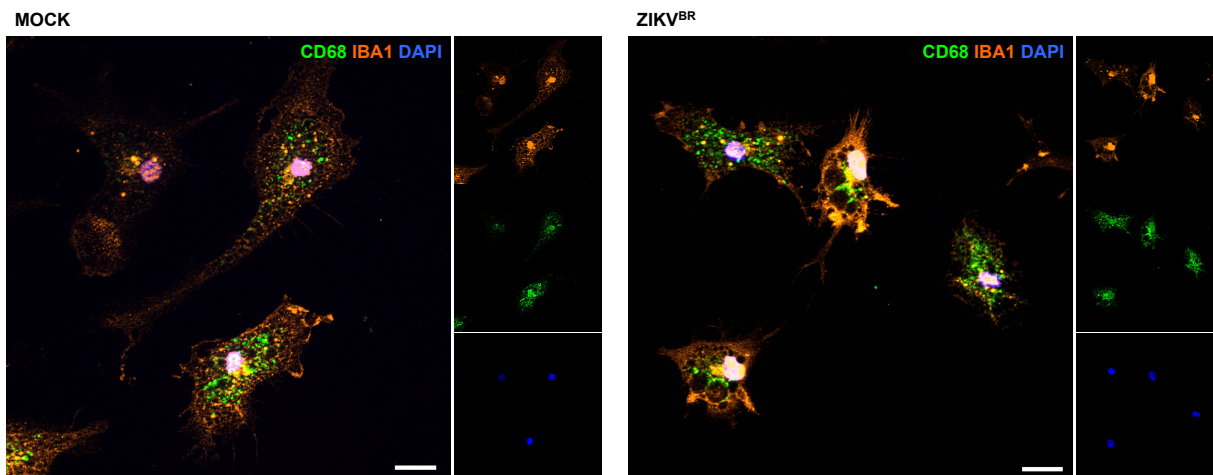

B

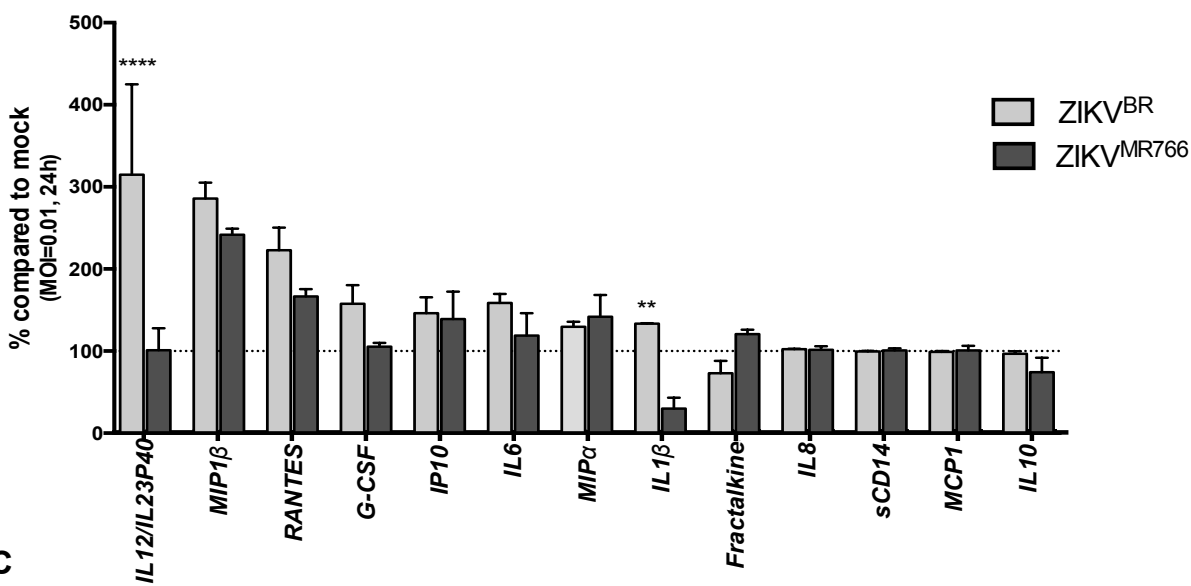

C

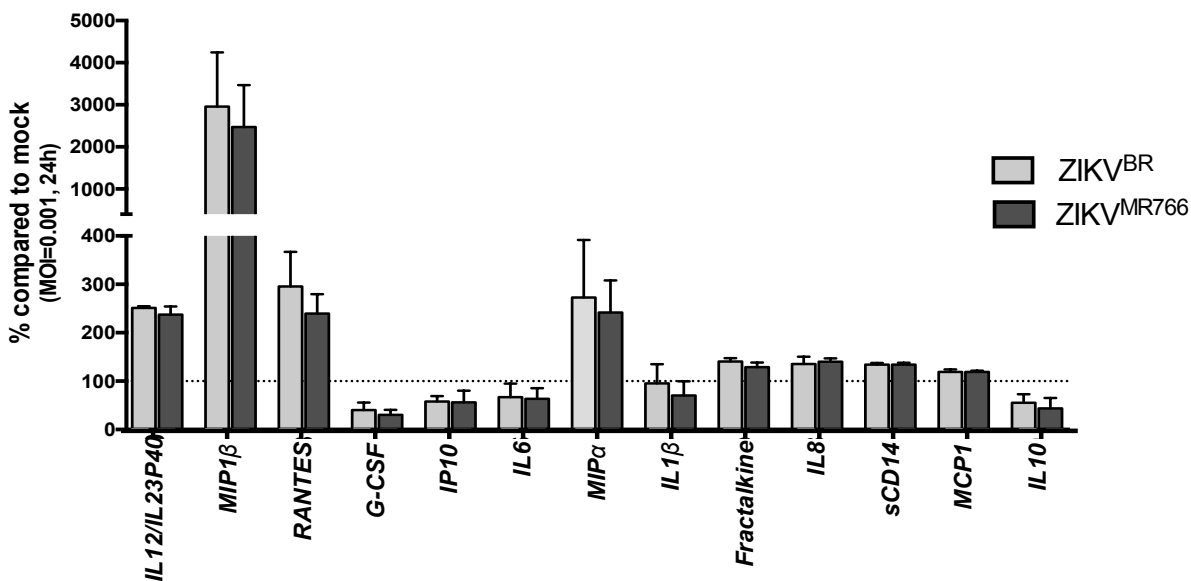

Figure S5

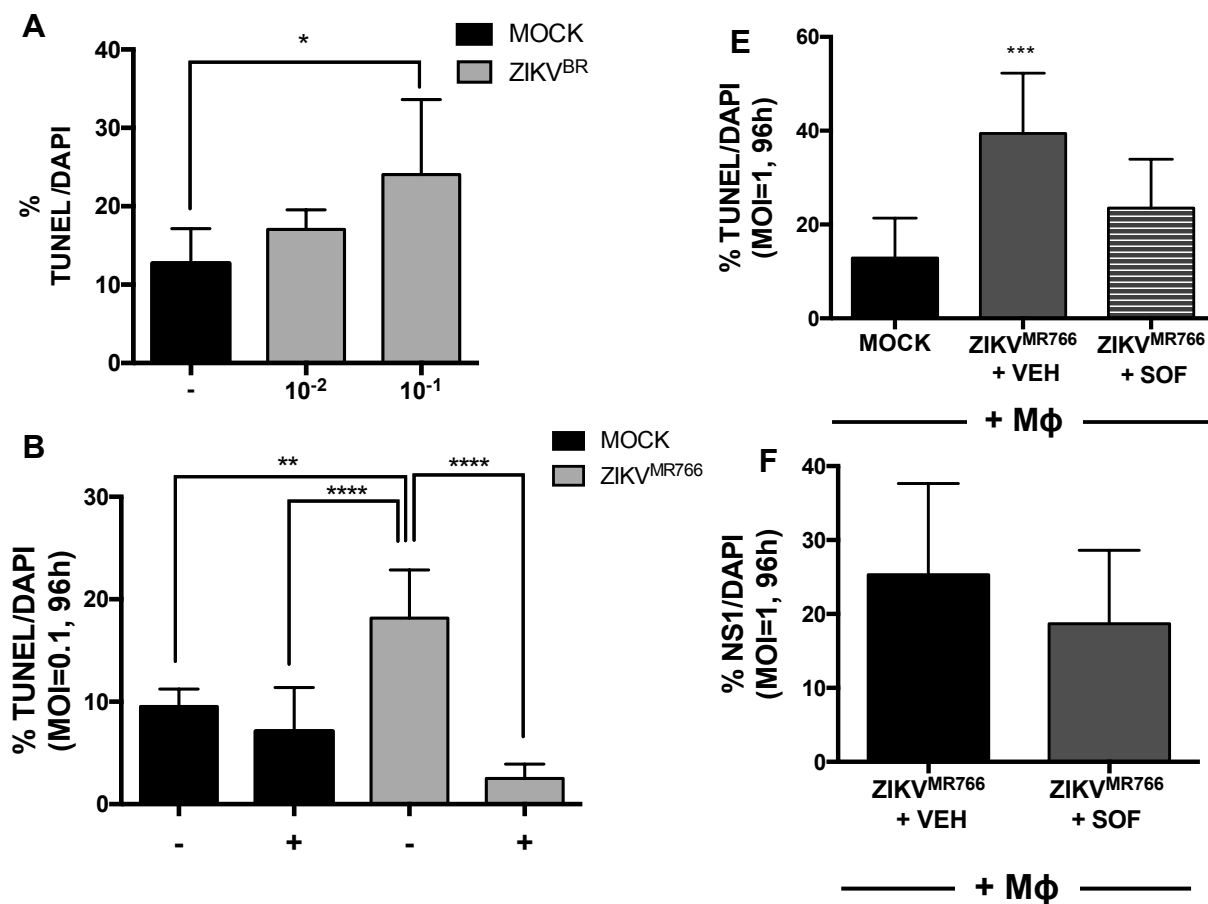

| % Mφ/NPC           | Mean±SD (%)   | p-value  |
|--------------------|---------------|----------|
| Mock               | 2.195 ± 0.103 | p=0.4766 |
| ZIKV <sup>BR</sup> | 1.833 ± 0.793 |          |

| Mφ in apoptosis    | Mean±SD (%)   | p-value  |
|--------------------|---------------|----------|
| Mock               | 2.982 ± 3.619 | p=0.4638 |
| ZIKV <sup>BR</sup> | 1.693 ± 2.020 |          |
